# Supplementary material
Source: MDPI journal article supplement (https://www.mdpi.com/2073-4352/12/2/142)
Supplement: s1 [file s1 › crystals-1527152-supplementary.pdf]

# Supplementary Materials: Multicomponent Solids of DL-2-Hydroxy-2-Phenylacetic Acid and Pyridinecarboxamides

Alfonso Castiñeiras <sup>1,\*</sup>, Antonio Frontera <sup>2</sup>, Isabel García-Santos <sup>1</sup>, Josefa M. González-Pérez <sup>3</sup>, Juan Niclós-Gutiérrez <sup>3</sup> and Rocío Torres-Iglesias <sup>1</sup>

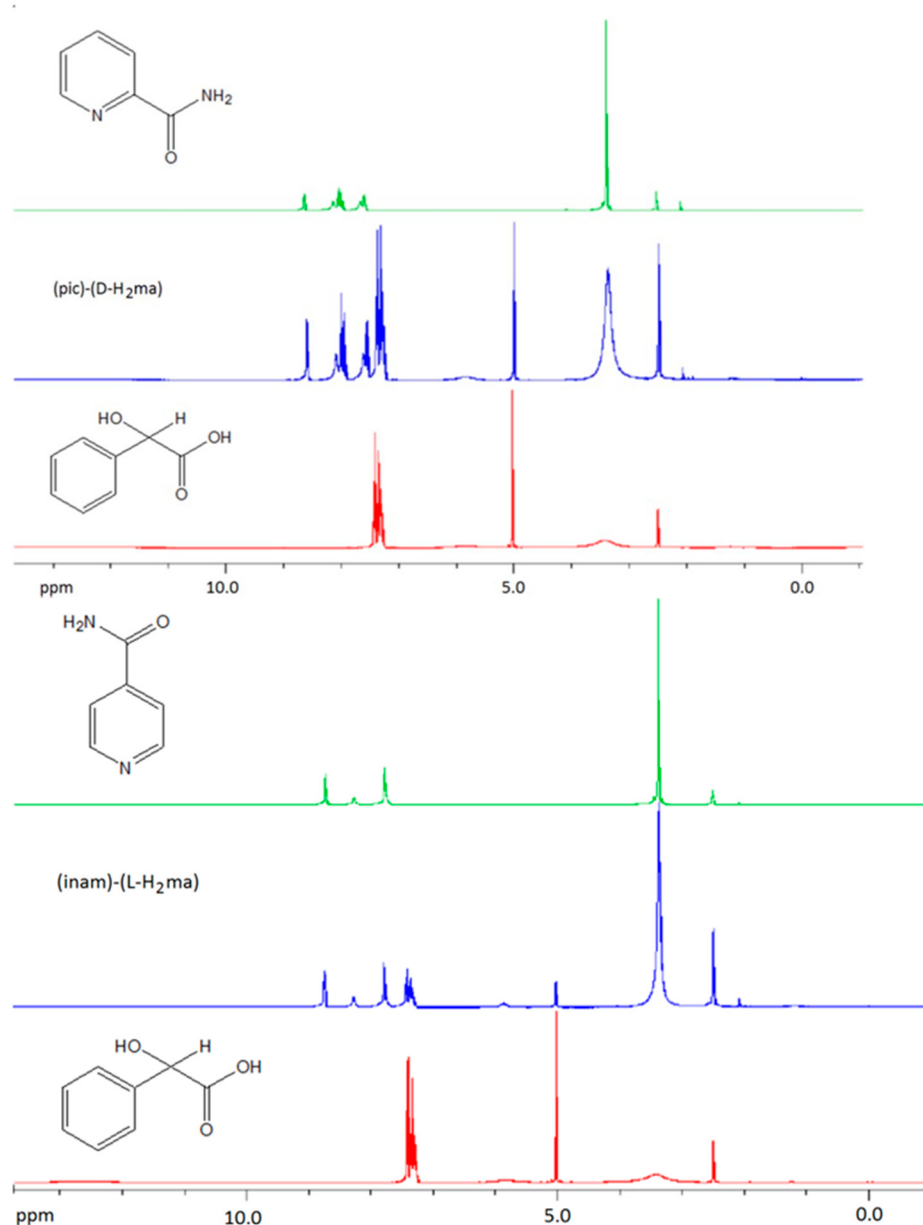

**Figure S1.** <sup>1</sup>H NMR spectra in DMSO-d<sub>6</sub> of cococrystals **1** (upper) and **3** (lower) comparative with their coformers.

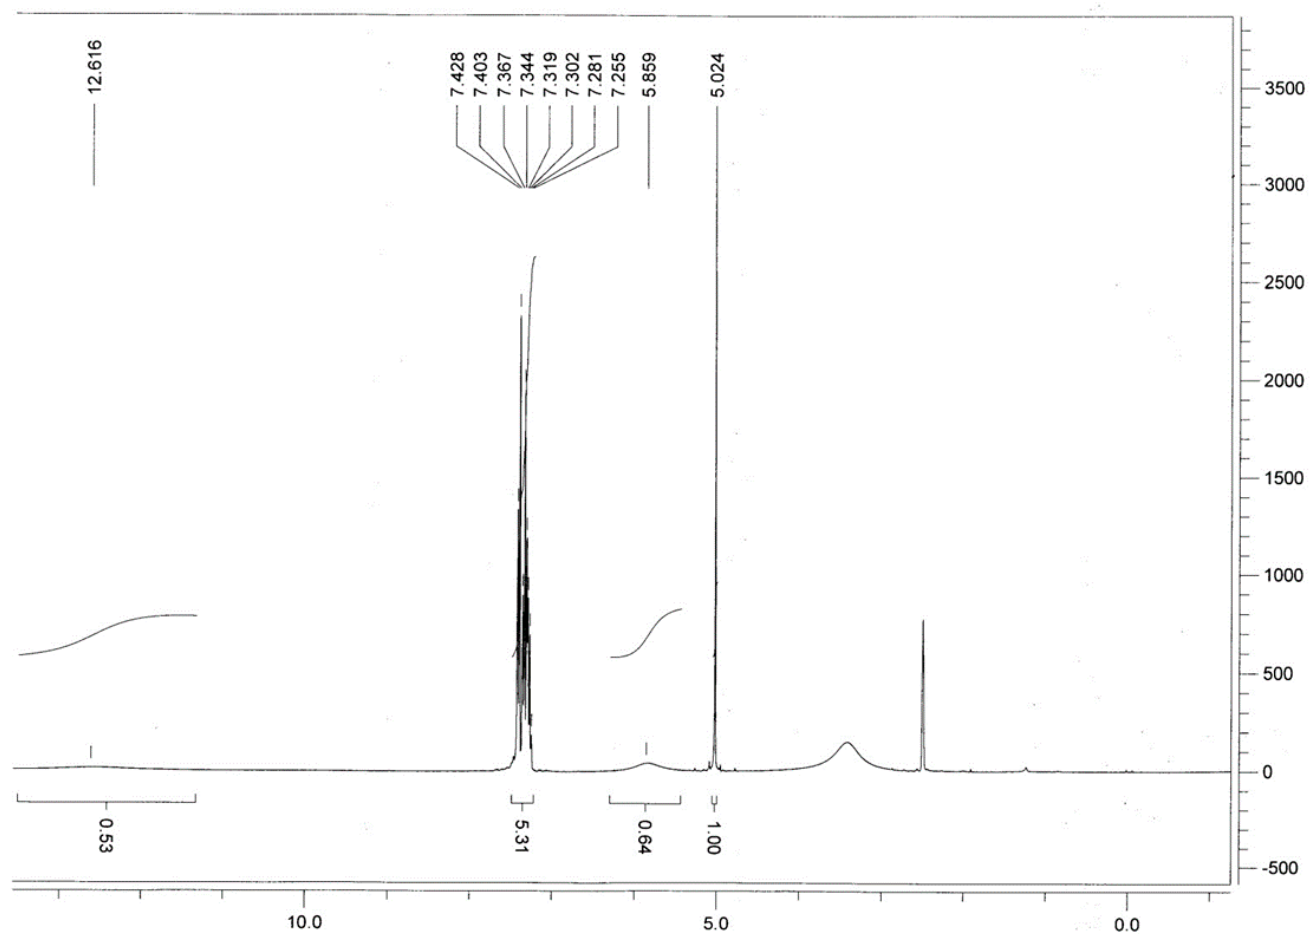

Figure S2.  $^1\text{H}$  NMR spectrum of DL-H<sub>2</sub>ma.

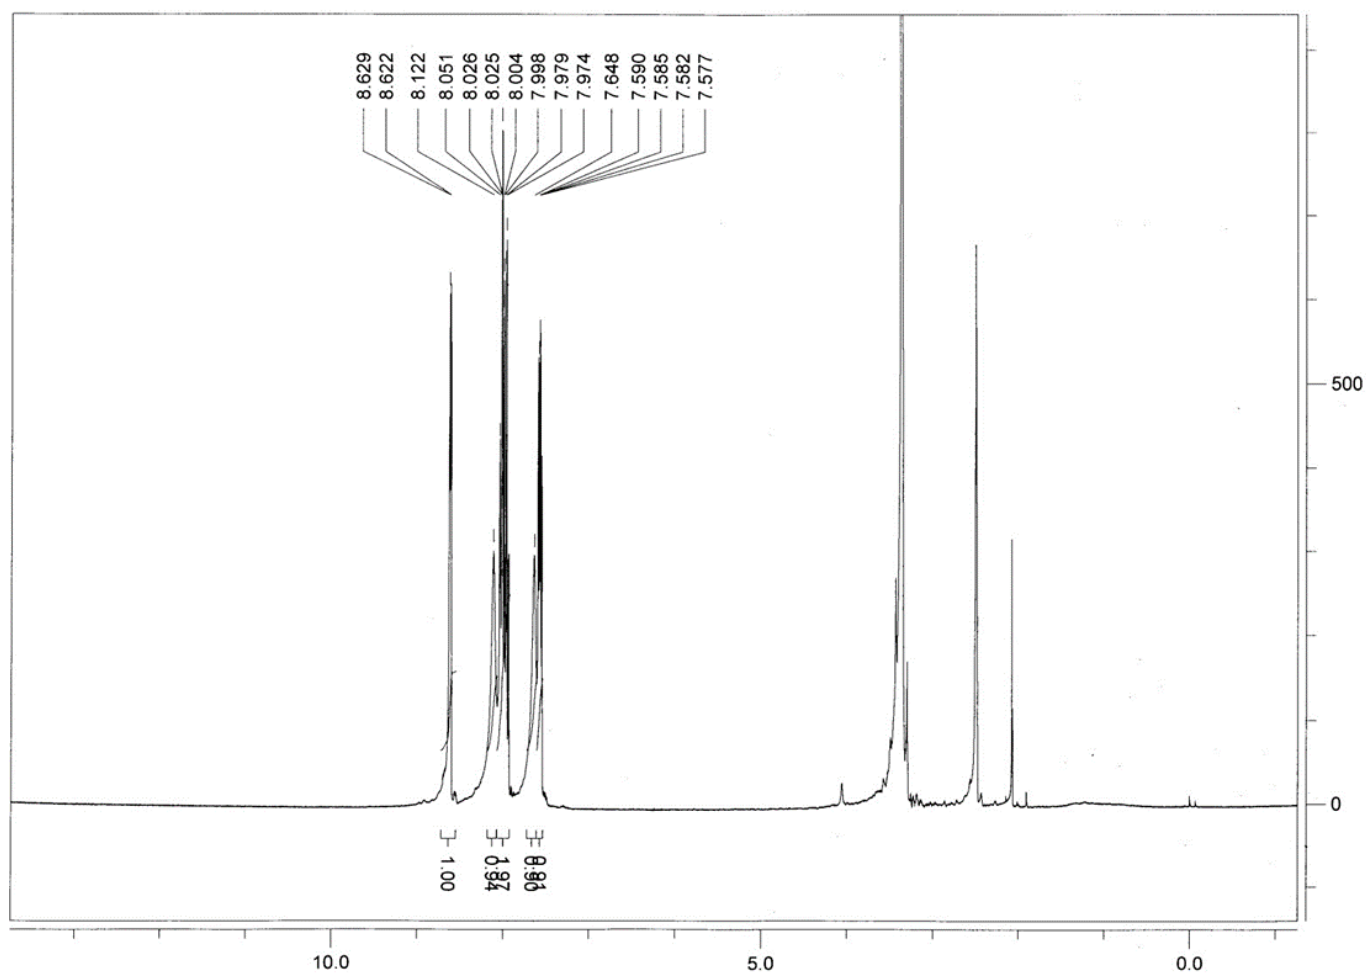

Figure S3.  $^1\text{H}$  NMR spectrum of **pic**.

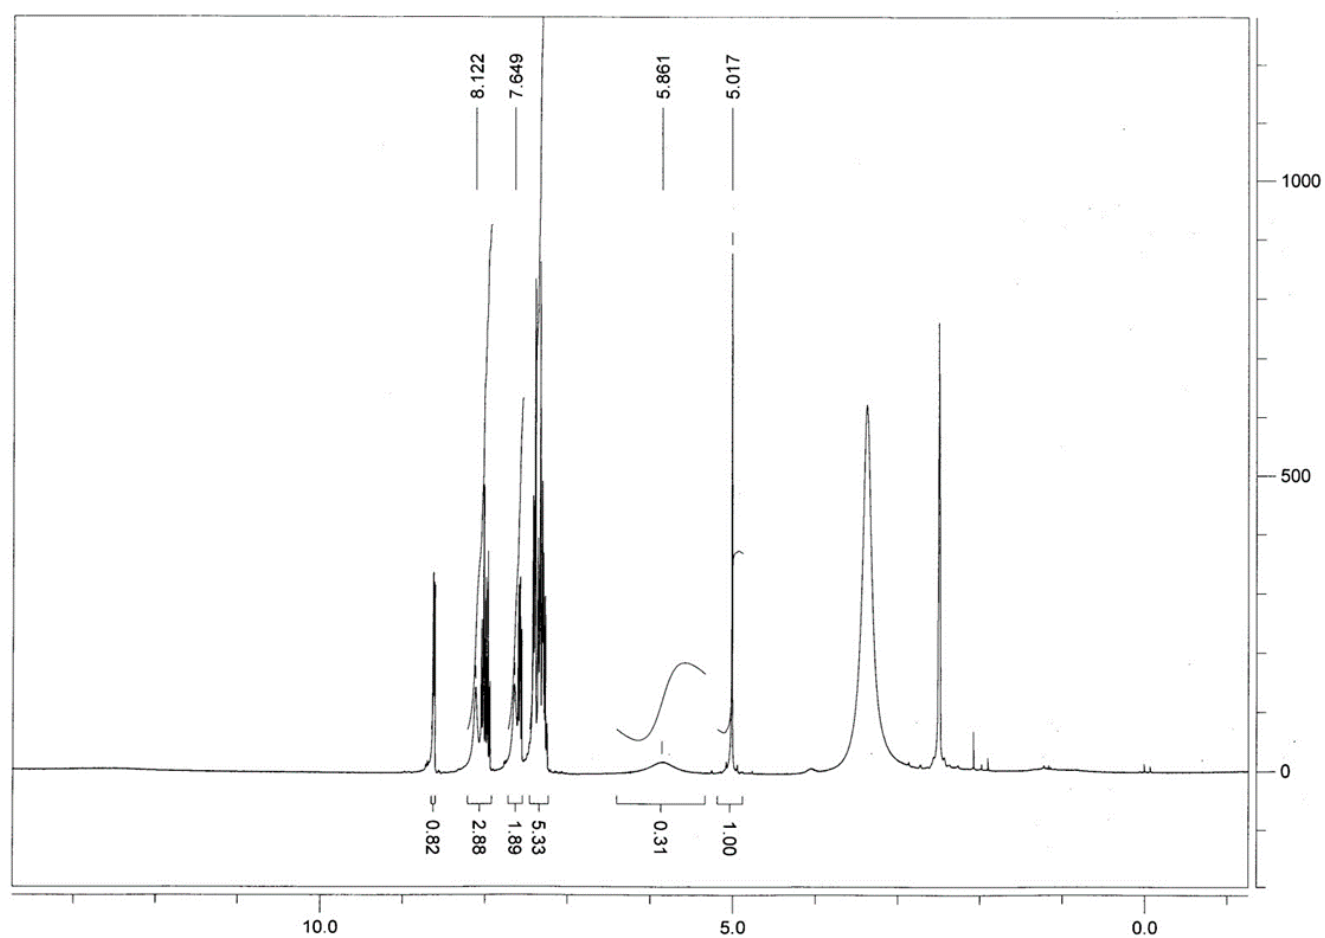

Figure S4.  $^1\text{H}$  NMR spectrum of (pic)-(D-Hzma) (1).

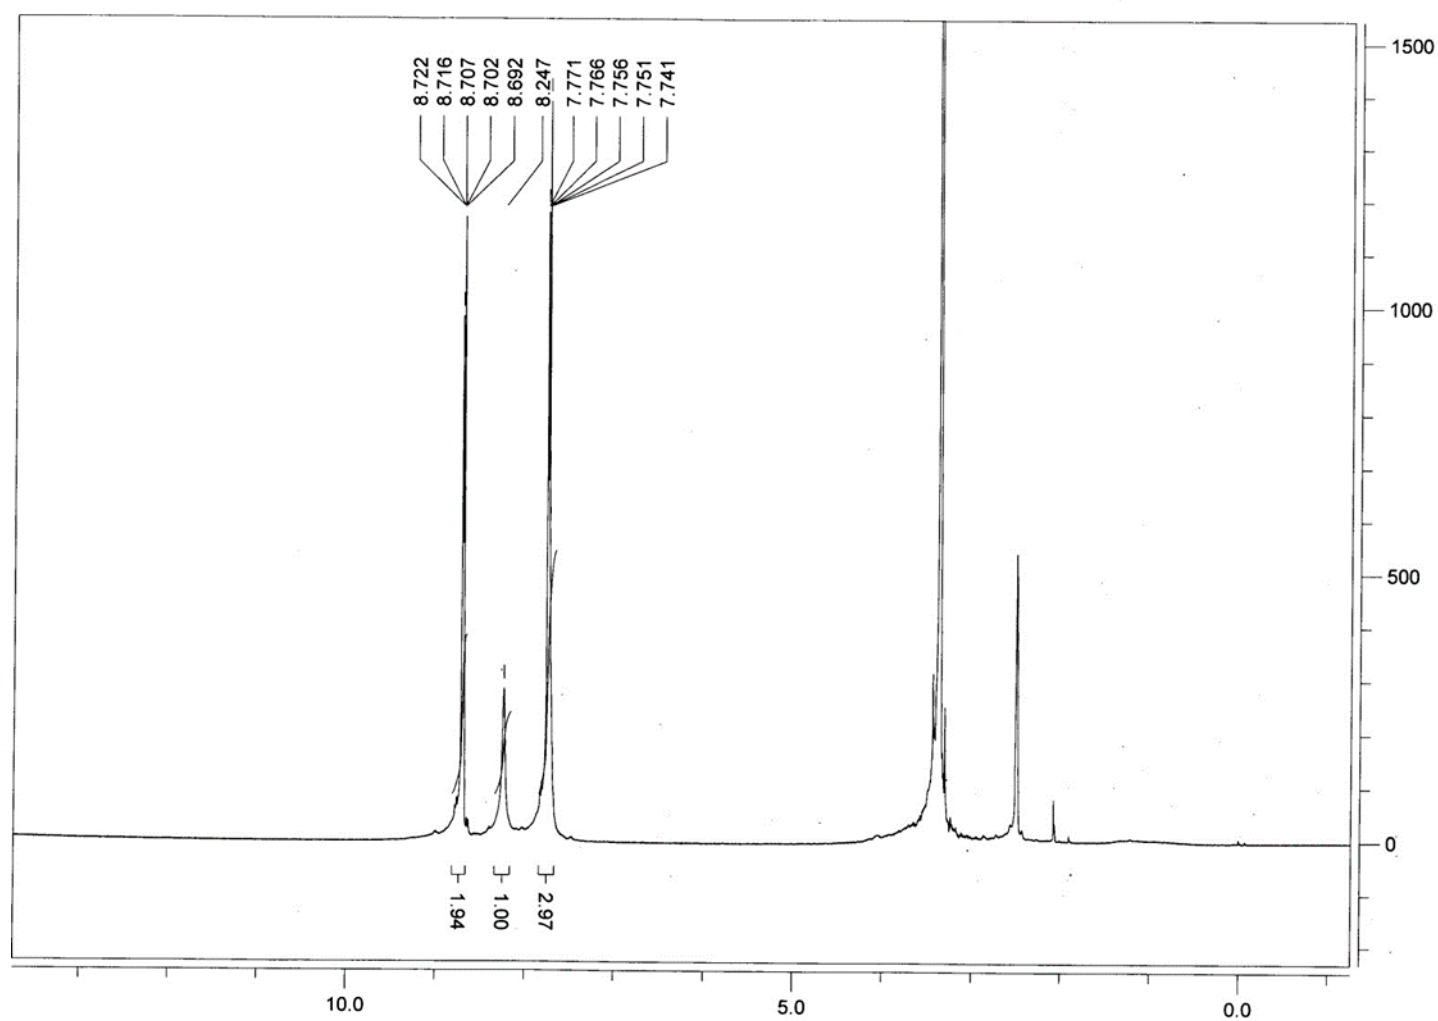

Figure S5.  $^1\text{H}$  NMR spectrum of *inam*.

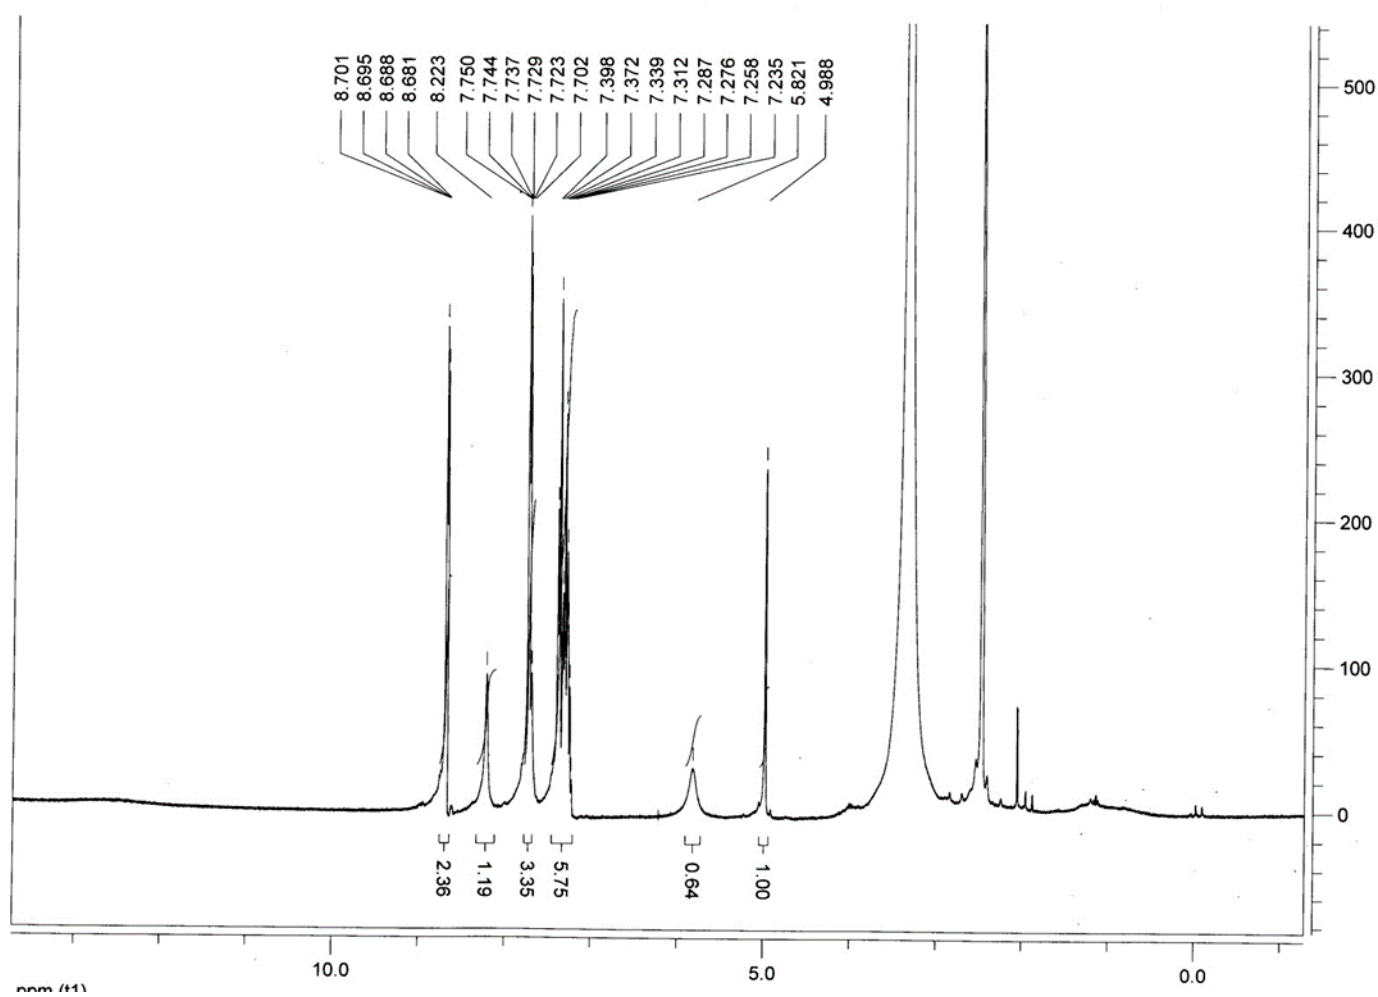

Figure S6.  $^1\text{H}$  NMR spectrum of (inam)-(L-Hzma) (3).

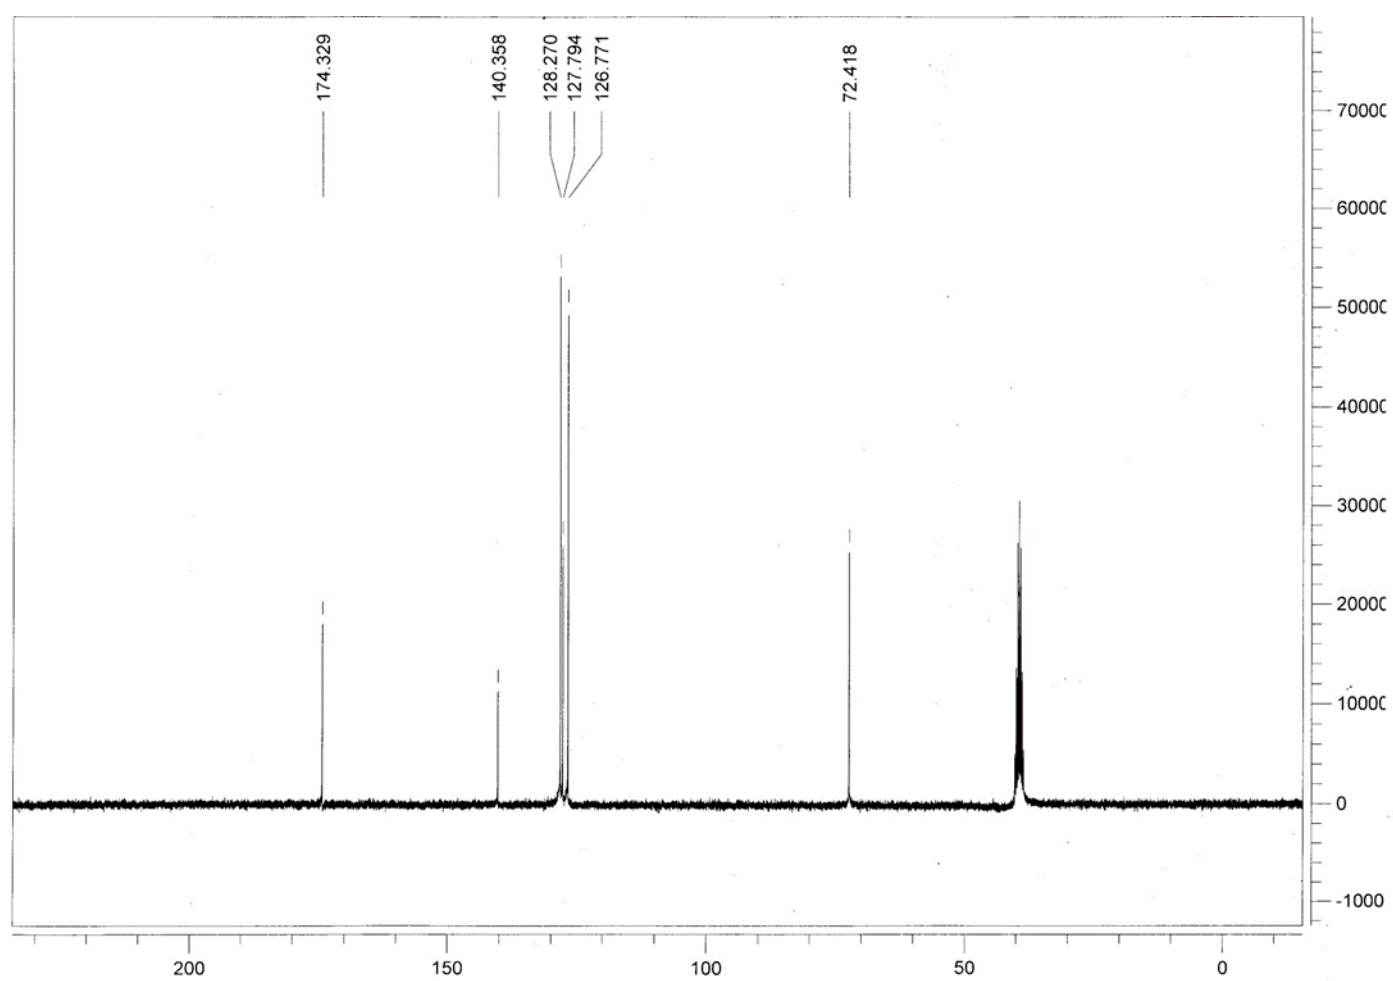

Figure S7.  $^{13}\text{C}$  NMR spectrum of DL-H<sub>2</sub>ma.

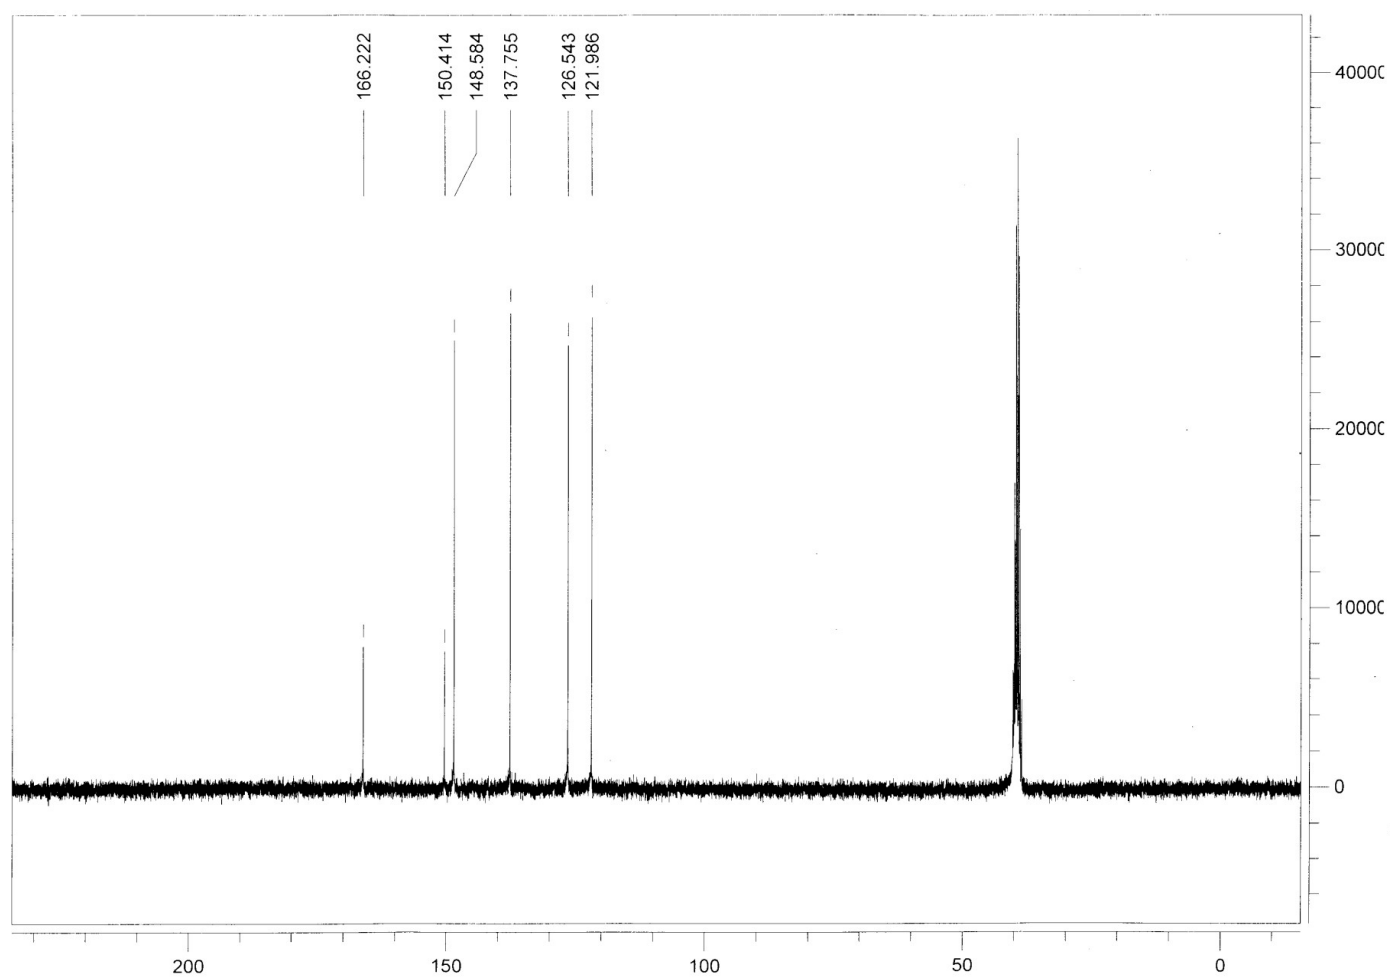

Figure S8.  $^{13}\text{C}$  NMR spectrum of pic.

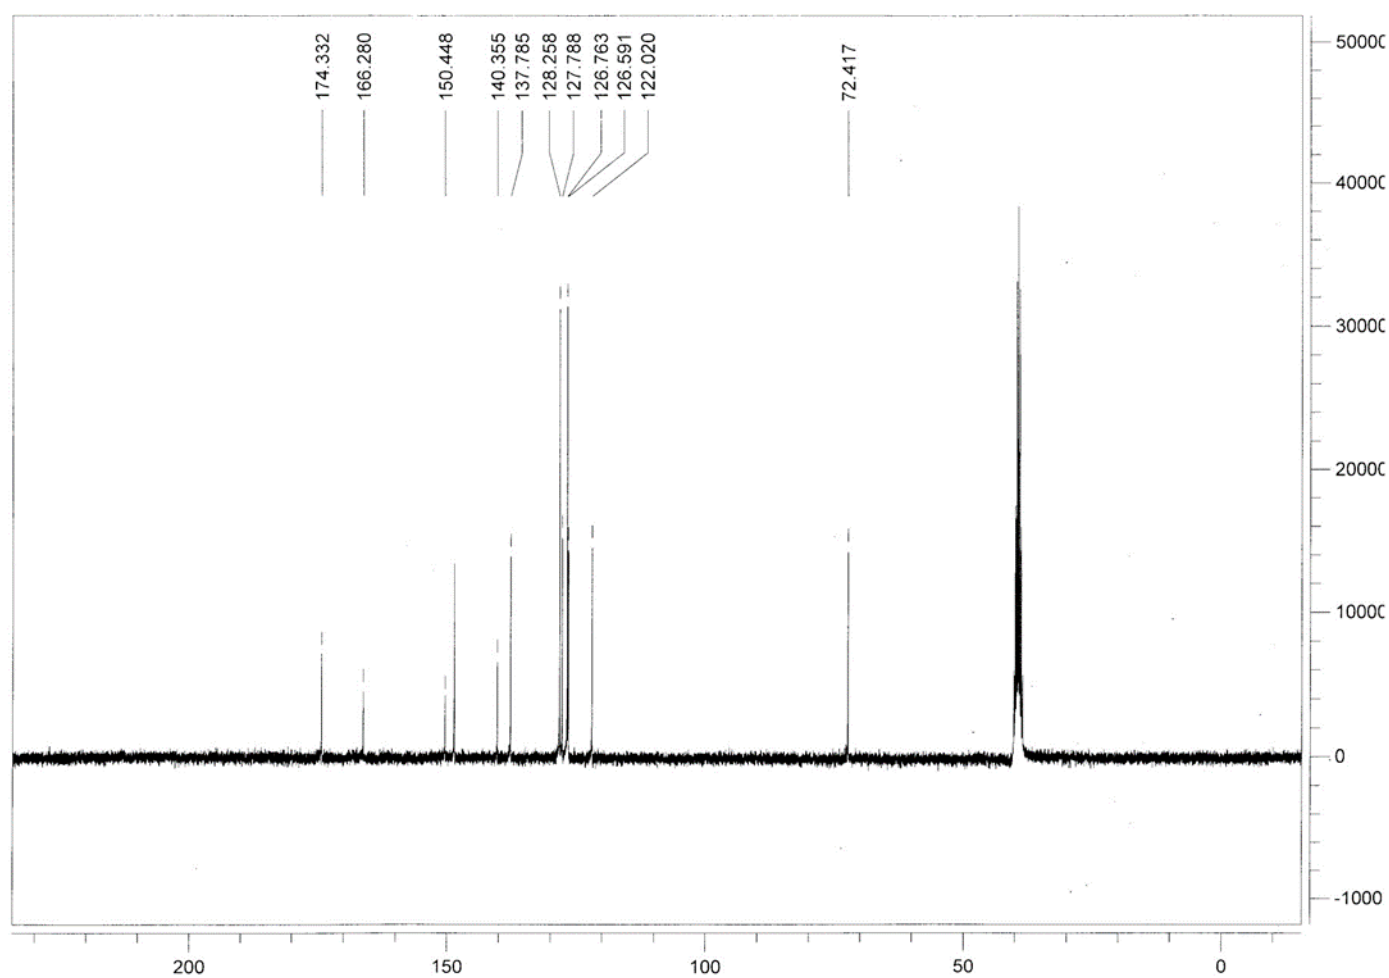

Figure S9.  $^{13}\text{C}$  NMR spectrum of (pic)-(D-H<sub>2</sub>ma) (1).

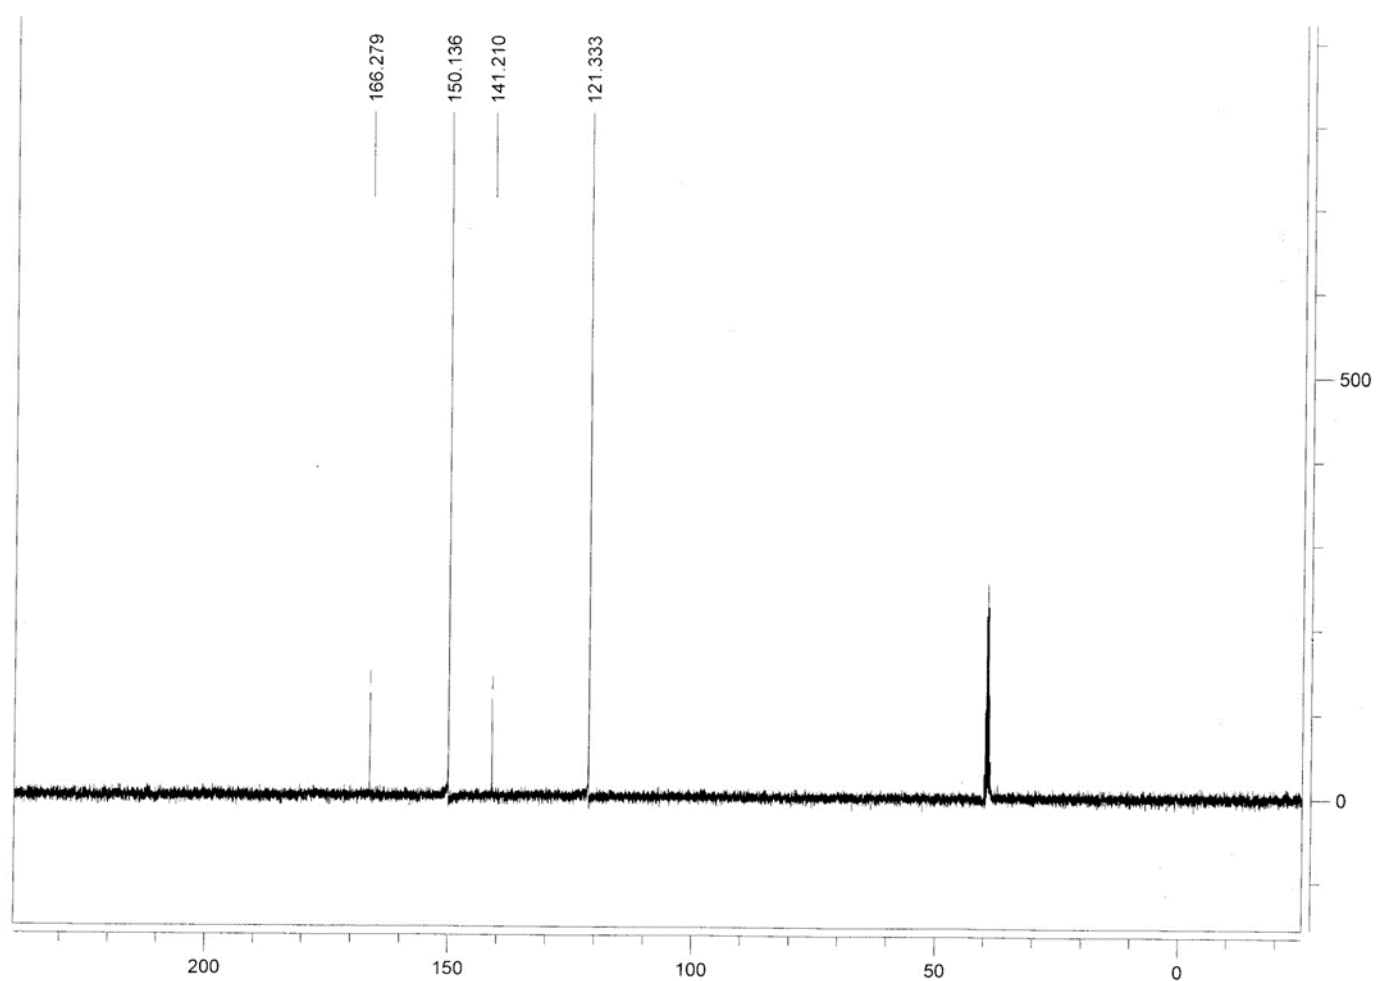

Figure S10.  $^{13}\text{C}$  NMR spectrum of **inam**.

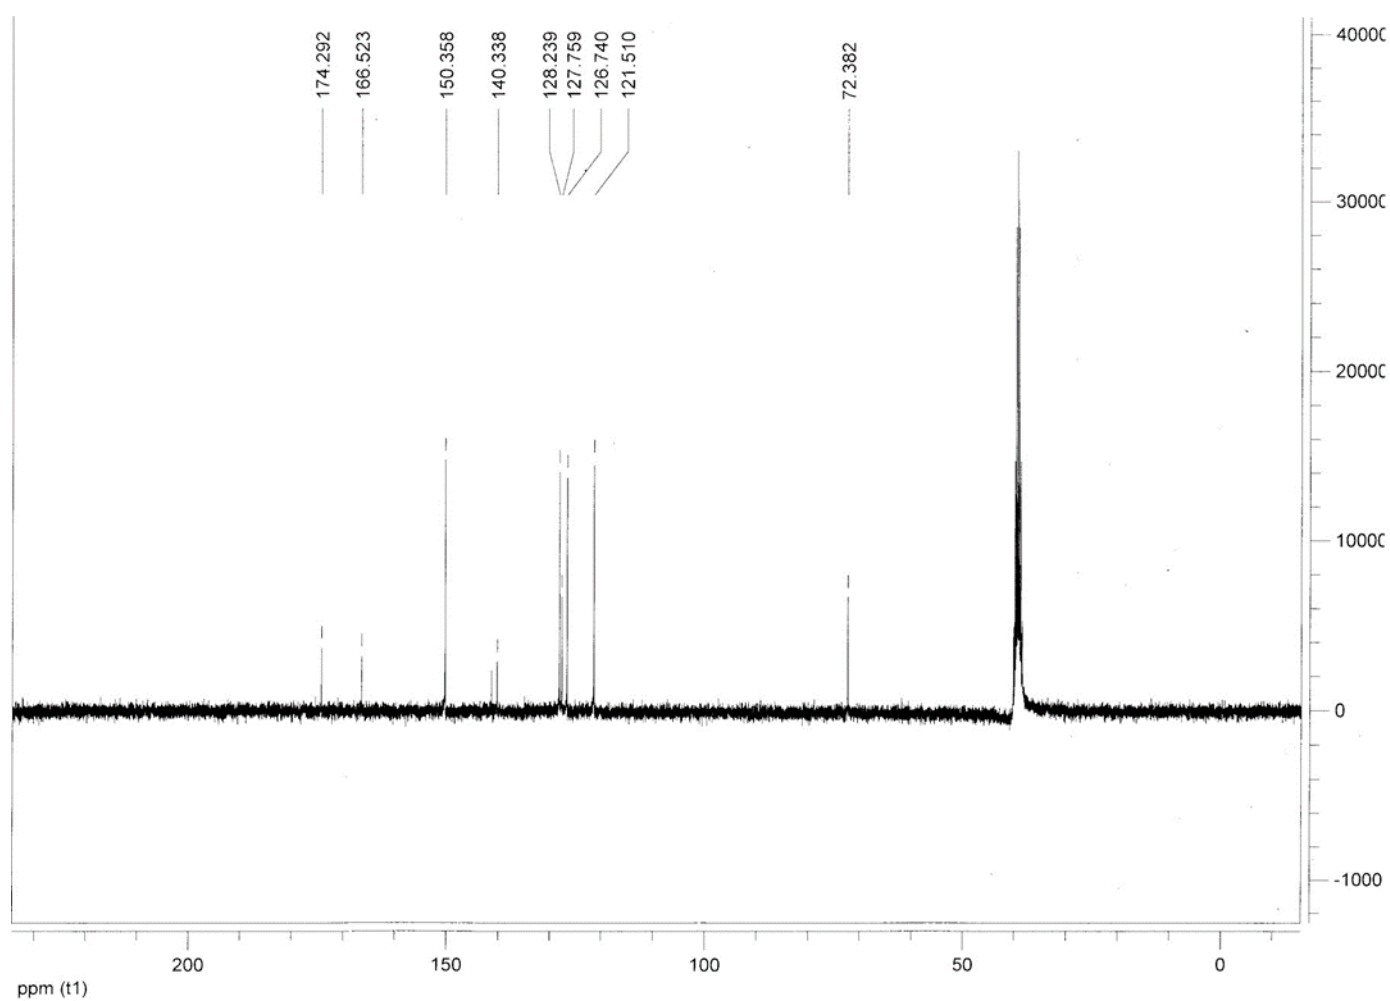

**Figure S11.** <sup>13</sup>C NMR spectrum of (inam)-(L-H<sub>2</sub>ma) (3).

**Table S1.** Hydrogen bond parameters [ $\text{\AA}$ ,  $^\circ$ ] for cocrystals. Letters included as superscripts refer to symmetry codes shown in text and figures.

| Compound                         | D–H...A                     | D–H       | H...A     | D...A      | DHA       | Symmetry code       |
|----------------------------------|-----------------------------|-----------|-----------|------------|-----------|---------------------|
| (pic)-(D-H <sub>2</sub> ma) (1)  | O11 H11...O10 <sup>a</sup>  | 0.943(19) | 1.617(19) | 2.5472(13) | 168.3(17) | -x+1, -y, -z+1      |
|                                  | O13 H13...N13 <sup>b</sup>  | 0.846(19) | 2.374(19) | 3.0708(15) | 139.9(16) | x+1, y, z-1         |
|                                  | N10 H10A...O12 <sup>a</sup> | 0.900(17) | 2.046(18) | 2.9287(16) | 166.6(15) | -x+1, -y, -z+1      |
|                                  | N10 H10B...O12 <sup>c</sup> | 0.871(18) | 2.348(17) | 2.9479(15) | 126.3(14) | x-1, y, z+1         |
| HOGGOB [24]                      | O11 H11...O10               | 0.85(4)   | 1.81(3)   | 2.645(2)   | 167(4)    |                     |
|                                  | O13 H13...N23 <sup>a</sup>  | 0.85(4)   | 2.36(4)   | 3.005(3)   | 133(3)    | x+1, y+1, z         |
|                                  | N10 H10A...O12              | 0.86(3)   | 2.10(3)   | 2.946(3)   | 168(3)    |                     |
|                                  | N10 H10B...O32 <sup>c</sup> | 0.91(4)   | 2.22(4)   | 2.951(3)   | 137(3)    | x, y+1, z           |
|                                  | O31 H31...O20 <sup>b</sup>  | 0.83(4)   | 1.74(4)   | 2.554(2)   | 166(4)    | x+1, y, z           |
|                                  | O33 H33...O10               | 0.85(3)   | 2.21(4)   | 3.001(3)   | 155(4)    |                     |
|                                  | N20 H20A...O32 <sup>d</sup> | 0.88(3)   | 1.97(3)   | 2.834(3)   | 166(3)    | x-1, y, z           |
|                                  | N20 H20B...O12 <sup>e</sup> | 0.86(4)   | 2.20(4)   | 2.927(3)   | 142(3)    | x-1, y-1, z         |
| JILZOU01 (2a) [25]               | O11 H11...N14 <sup>a</sup>  | 0.852(19) | 1.835(19) | 2.6843(13) | 175.0(15) | x, y-1, z           |
|                                  | O13 H13A...O10 <sup>b</sup> | 0.834(18) | 1.993(16) | 2.7084(11) | 143.3(15) | -x,y-1/2,-z+1       |
|                                  | N10 H10A...O12 <sup>c</sup> | 0.875(15) | 2.184(15) | 3.0020(12) | 155.4(15) | -x,y+1/2,-z+1       |
|                                  | N10 H10B...O13              | 0.898(17) | 2.140(16) | 2.9212(13) | 144.9(13) |                     |
|                                  | C13 H13...O10 <sup>e</sup>  | 0.95      | 2.342     | 3.103      | 136.7     | x,y+1,z             |
| JILZOU (2b) [26]                 | O11 H11...N24 <sup>a</sup>  | 0.85(3)   | 1.77(3)   | 2.605(2)   | 171(3)    | -x+1/2, y+3/2, -z   |
|                                  | O13 H13A...O12 <sup>b</sup> | 0.84(3)   | 1.93(3)   | 2.6826(18) | 148(2)    | -x+1/2, y-1/2, -z   |
|                                  | N10 H10A...O20 <sup>d</sup> | 0.88(3)   | 2.06(3)   | 2.902(2)   | 159(2)    | -x+1/2, y-1/2, -z+1 |
|                                  | N10 H10B...O13 <sup>d</sup> | 0.88(2)   | 2.21(2)   | 3.0138(17) | 152(2)    |                     |
|                                  | O31 H31...N14               | 0.84(2)   | 1.77(2)   | 2.6046(18) | 176(2)    |                     |
|                                  | O33 H33...O31 <sup>c</sup>  | 0.84(3)   | 2.40(3)   | 3.148(2)   | 149(3)    | x, y-1, z           |
|                                  | N20 H20A...O10 <sup>e</sup> | 0.88(3)   | 2.06(3)   | 2.932(2)   | 169(2)    | -x+1/2, y+1/2, -z+1 |
|                                  | N20 H20B...O10              | 0.88(2)   | 2.12(2)   | 2.9734(18) | 162.0(19) |                     |
| (inam)-(L-H <sub>2</sub> ma) (3) | O11 H11A...N15 <sup>a</sup> | 0.966(17) | 1.659(17) | 2.6241(14) | 177.3(16) | x-1, y, z           |
|                                  | O13 H13A...O10 <sup>b</sup> | 0.818(17) | 1.983(17) | 2.7750(14) | 162.9(16) | x, y, z-1           |
|                                  | N10 H10A...O13 <sup>c</sup> | 0.851(15) | 2.234(15) | 2.9493(14) | 141.7(14) | -x+1, -y, -z+1      |
|                                  | N10 H10B...O10 <sup>d</sup> | 0.913(15) | 1.969(16) | 2.8814(14) | 179.7(16) | -x, -y, -z+2        |
|                                  | C16 H16...O12 <sup>e</sup>  | 0.95      | 2.640     | 3.310      | 127.9     | x+1, y, z           |
|                                  | C17 H17...O12 <sup>c</sup>  | 0.95      | 2.580     | 3.176      | 121.2     | -x+1, -y, -z+1      |

### Crystallographic

The two crystals were obtained from the crystallization of solutions prepared re- 33 acting the pyridinecarboxamide isomers with DL-mandelic acid in a molar ratio 1:1. 34 Although the X-ray diffraction data were taken at 100 K, solid handling was always done at room temperature.

Diffraction data were obtained at 100(1) K using a Bruker X8 Kappa APEXII diffractometer from crystals mounted on glass fibers. Data were corrected for Lorentz and polarization effects and for absorption following multiscan [1] type. The structures were solved by direct methods [2], which revealed the positions of all nonhydrogen atoms. 40 These were refined on  $F^2$  by a full-matrix least-squares procedure using anisotropic dis- 41 placement parameters [2]. Hydrogen atoms

were located in the difference maps and the positions of O–H and N–H hydrogen atoms were refined (others were included as riders); the isotropic displacement parameters of H atoms were constrained to 1.2  $U_{eq}$  of the carrier atoms. Molecular graphics were generated with ORTEP [3] and DIAMOND [4].

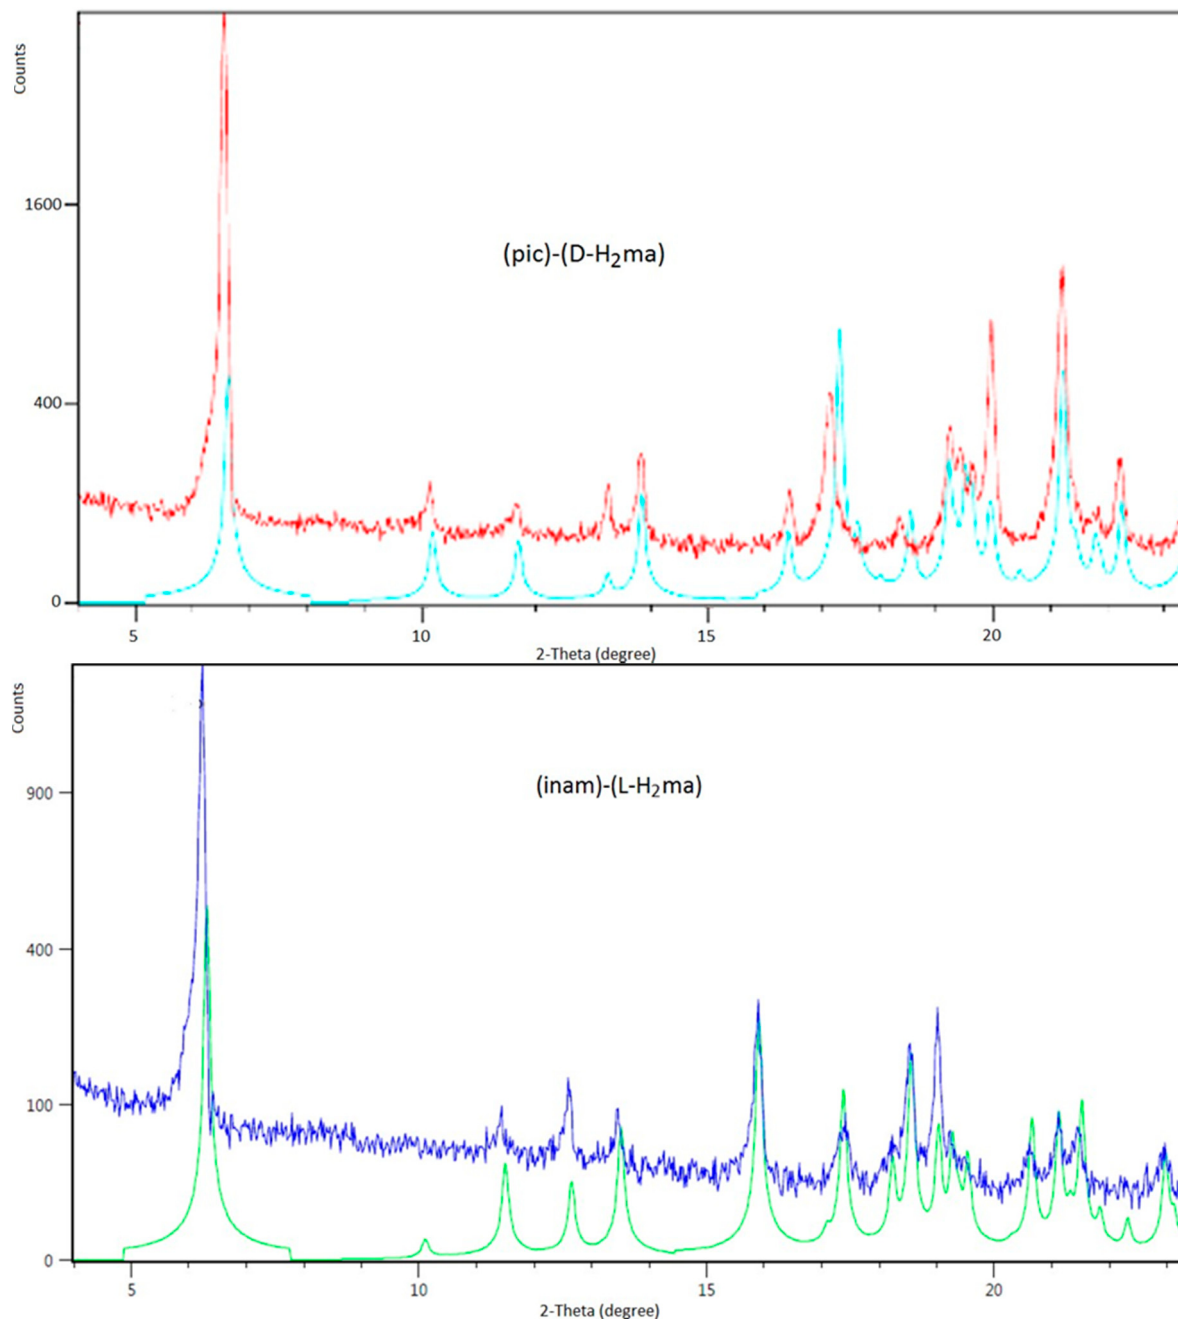

**Figure S12.** XRPD patterns of the solid forms of 1 and 3, obtained at room temperature. The XRPD-patterns of the cocrystals match well with the simulated XRPD. 49

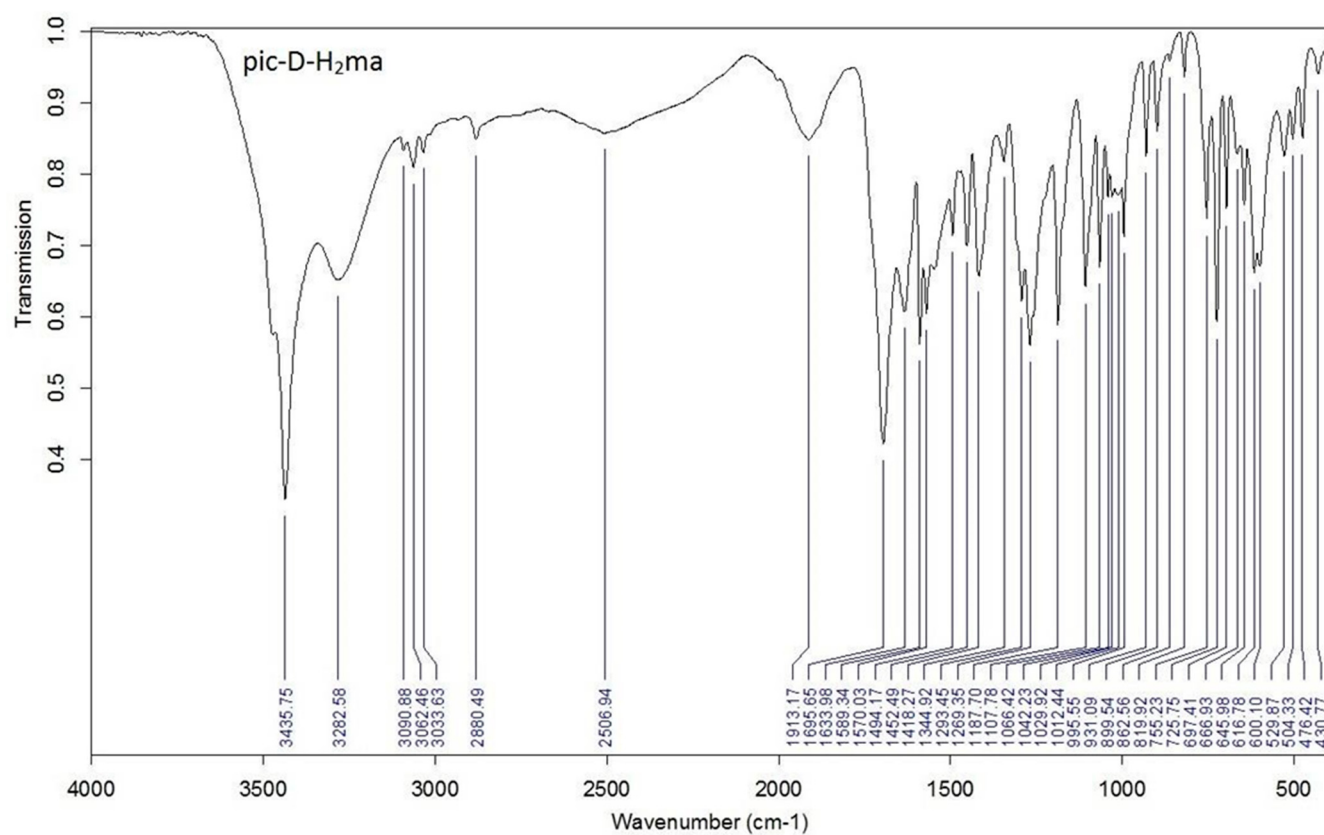

Figure S13. IR spectrum of (pic)-(D-H<sub>2</sub>ma) (1).

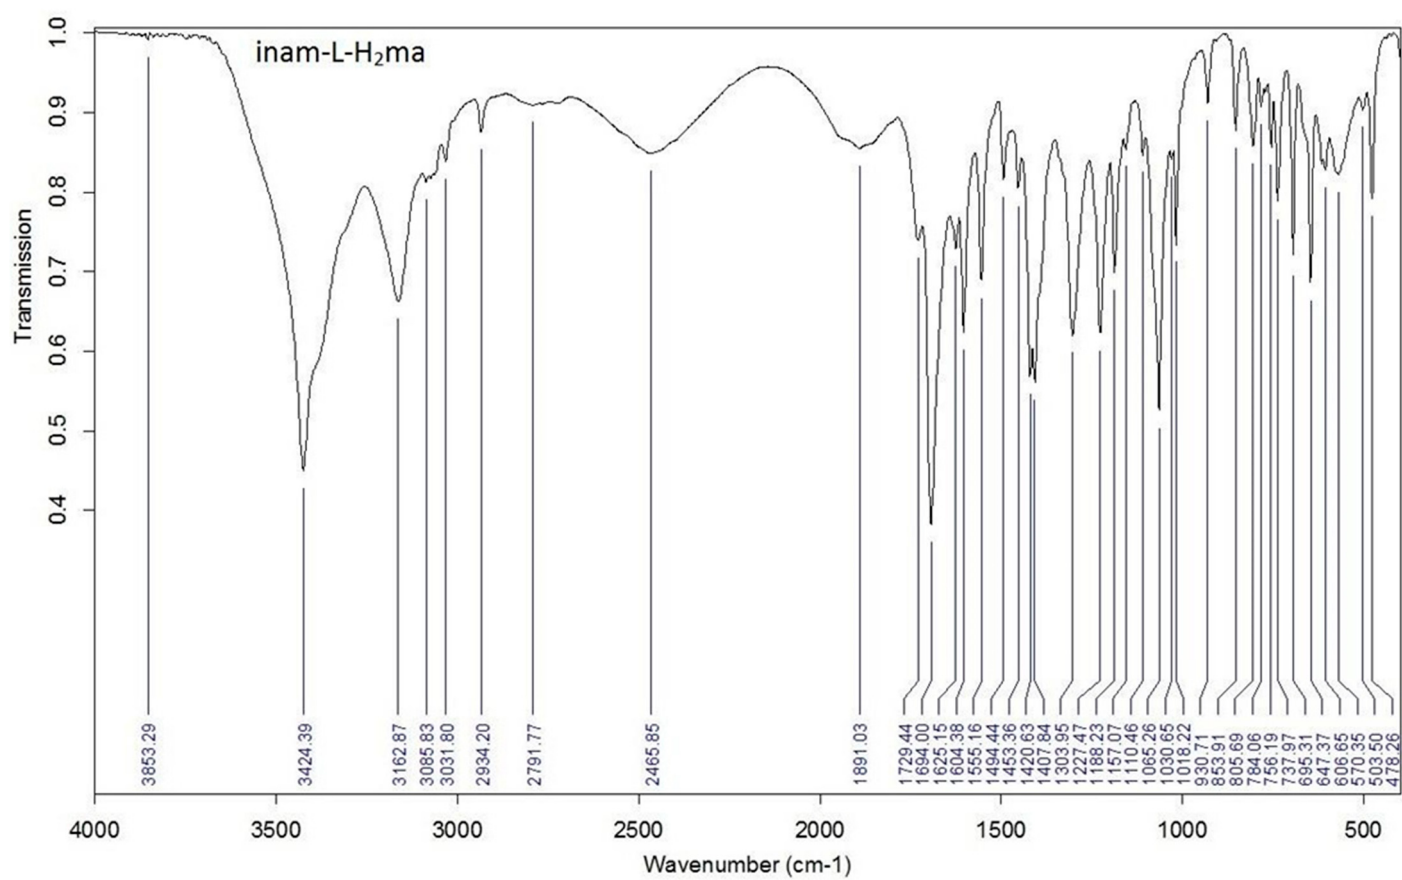

Figure S14. IR Spectrum of (inam)-(L-H<sub>2</sub>ma) (3).
